# Supplementary material for: Optimizing Workflows for Fast and Reliable Metabolic Tumor Volume Measurements in Diffuse Large B Cell Lymphoma
Source: Mol Imaging Biol. 2020 Jan 28;22(4):1102–10. doi: 10.1007/s11307-020-01474-z (PMC7343740; doi:10.1007/s11307-020-01474-z)

**SUPPLEMENTARY MATERIAL**

***Concise and informative title:***

Optimizing workflows for fast and reliable Metabolic Tumor Volume measurements in Diffuse Large B-cell Lymphoma

***Authors:***

Coreline N. Burggraaff1, Fareen Rahman2, Isabelle Kaßner3, Simone Pieplenbosch1, Sally F. Barrington4, Yvonne W.S. Jauw1,5, Gerben J.C. Zwezerijnen5, Stefan Müller3, Otto S. Hoekstra5, Josée M. Zijlstra1, Henrica C.W. De Vet6, Ronald Boellaard5

***Shortened title:***

Workflow optimization of MTV in DLBCL

***Journal:***

Molecular Imaging and Biology

***Manuscript category:***

Original article

***Affiliations:***

On behalf of the PETRA Consortium

1Department of Hematology, Amsterdam UMC, Vrije Universiteit Amsterdam, Cancer Center Amsterdam, The Netherlands ([c.burggraaff@amsterdamumc.nl](mailto:c.burggraaff@amsterdamumc.nl); [s.pieplenbosch@amsterdamumc.nl](mailto:s.pieplenbosch@amsterdamumc.nl); [yws.jauw@amsterdamumc.nl](mailto:yws.jauw@amsterdamumc.nl); [j.zijlstra@amsterdamumc.nl](mailto:j.zijlstra@amsterdamumc.nl))

2Department of Clinical Oncology, Guy’s and St Thomas’ NHS Foundation Trust, Guys Cancer, London Bridge, United Kingdom ([fareen@doctors.org.uk](mailto:fareen@doctors.org.uk))

3Department of Nuclear Medicine, University Hospital Essen, University of Duisburg-Essen, Germany

(isabelle.k87@googlemail.com; [stefan.mueller@uni-due.de](mailto:stefan.mueller@uni-due.de))

4King’s College London and Guy’s and St Thomas’ PET Centre, School of Biomedical Engineering and Imaging Sciences, King’s College London, King’s Health Partners, London, United Kingdom ([sally.barrington@kcl.ac.uk](mailto:sally.barrington@kcl.ac.uk))

5Department of Radiology and Nuclear Medicine, Amsterdam UMC, Vrije Universiteit Amsterdam, Cancer Center Amsterdam, The Netherlands ([yws.jauw@amsterdamumc.nl](mailto:yws.jauw@amsterdamumc.nl); [g.zwezerijnen@amsterdamumc.n](mailto:g.zwezerijnen@amsterdamumc.n)l; [os.hoekstra@amsterdamumc.nl](mailto:os.hoekstra@amsterdamumc.nl); [r.boellaard@amsterdamumc.nl](mailto:r.boellaard@amsterdamumc.nl))

6Department of Epidemiology and Biostatistics, Amsterdam UMC, Vrije Universiteit Amsterdam, Amsterdam Public Health research institute, The Netherlands ([hcw.devet@amsterdamumc.nl](mailto:hcw.devet@amsterdamumc.nl))

***Corresponding author: First author:***

Prof. Ronald Boellaard, PhD Coreline N. Burggraaff, MD, PhD candidate

r.boellaard@amsterdamumc.nl c.burggraaff@amsterdamumc.nl

ORCID: 0000-0001-5863-6528

Address: Department of Radiology and Nuclear Medicine

Amsterdam UMC, Vrije Universiteit Amsterdam,

De Boelelaan 1117

1081HV Amsterdam

Phone: +31(0)2044449638

**SUPPLEMENTAL FIGURE 1**
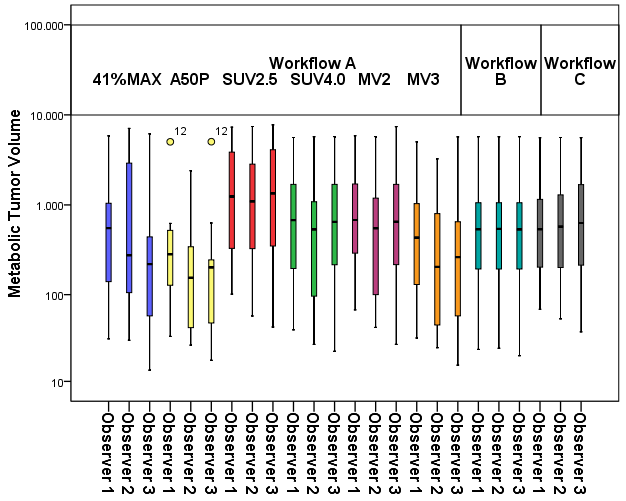


**SUPPLEMENTAL FIGURE 2**


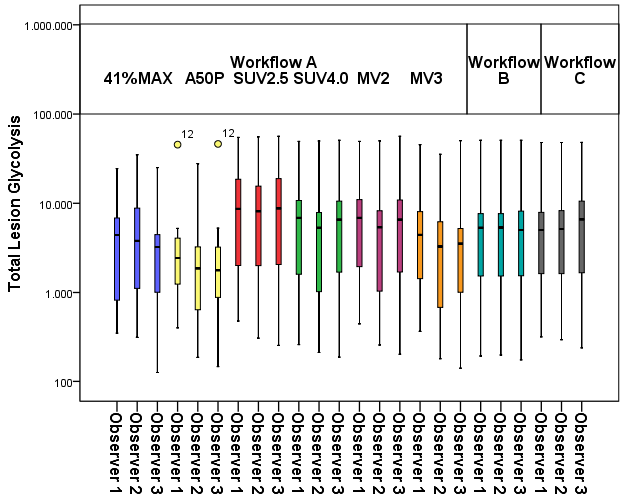

Supplement: Supplementary file 1 — (DOCX 1854 kb) [file 11307_2020_1474_MOESM1_ESM.docx]
